# Supplementary material
Source: MDPI journal article supplement (https://www.mdpi.com/2673-8937/2/4/39)
Supplement: s1 [file s1]

Archive with 1 entries (1 files):
- ijtm-1924447-supplementary.pdf
